# Supplementary material for: A Systematic Review of Epstein–Barr Virus Latent Membrane Protein 1 (LMP1) Gene Variants in Nasopharyngeal Carcinoma
Source: MDPI journal article supplement (doi:10.3390/pathogens10081057), 2021-08-20
Supplement: s1 [file s1]

Table S1. Summary of findings.

Question: LMP1 gene variants in Nasopharyngeal carcinoma

| Certainty assessment                                                                |                       |                               |               |              |                      |                                                                                                                           | № of patients   |                 | Effect                       |                                                   | Certainty        | Importance |
|-------------------------------------------------------------------------------------|-----------------------|-------------------------------|---------------|--------------|----------------------|---------------------------------------------------------------------------------------------------------------------------|-----------------|-----------------|------------------------------|---------------------------------------------------|------------------|------------|
| № of studies                                                                        | Study design          | Risk of bias                  | Inconsistency | Indirectness | Imprecision          | Other considerations                                                                                                      | LMP1 variants   |                 | Relative (95% CI)            | Absolute (95% CI)                                 |                  |            |
| Xhol loss in NPC vs. other tu biopsy                                                |                       |                               |               |              |                      |                                                                                                                           |                 |                 |                              |                                                   |                  |            |
| 10                                                                                  | observational studies | not serious <sup>a,b</sup>    | not serious   | not serious  | not serious          | all plausible residual confounding would reduce the demonstrated effect                                                   | 319/384 (83.1%) | 102/190 (53.7%) | OR 6.19<br>(3.55 to 10.78)   | 341 more per 1,000<br>(from 268 more to 389 more) | ⊕⊕⊕○<br>MODERATE | CRITICAL   |
| Xhol loss NPC vs. healthy respondents biopsy                                        |                       |                               |               |              |                      |                                                                                                                           |                 |                 |                              |                                                   |                  |            |
| 4                                                                                   | observational studies | serious <sup>a,b</sup>        | not serious   | not serious  | serious <sup>c</sup> | strong association<br>all plausible residual confounding would reduce the demonstrated effect                             | 116/122 (95.1%) | 45/73 (61.6%)   | OR 14.17<br>(4.99 to 40.20)  | 341 more per 1,000<br>(from 273 more to 368 more) | ⊕⊕○○<br>LOW      | CRITICAL   |
| Xhol loss NPC biopsy vs. healthy TWs                                                |                       |                               |               |              |                      |                                                                                                                           |                 |                 |                              |                                                   |                  |            |
| 4                                                                                   | observational studies | serious <sup>a,b</sup>        | not serious   | not serious  | serious <sup>c</sup> | very strong association<br>all plausible residual confounding would suggest spurious effect, while no effect was observed | 147/154 (95.5%) | 49/65 (75.4%)   | OR 24.60<br>(4.42 to 136.94) | 233 more per 1,000<br>(from 177 more to 244 more) | ⊕⊕⊕○<br>MODERATE | CRITICAL   |
| Xhol loss NPC vs. other EBV-associated non-NPC tumors biopsy in endemic regions     |                       |                               |               |              |                      |                                                                                                                           |                 |                 |                              |                                                   |                  |            |
| 7                                                                                   | observational studies | serious <sup>a,b</sup>        | not serious   | not serious  | not serious          | all plausible residual confounding would reduce the demonstrated effect                                                   | 215/244 (88.1%) | 96/124 (77.4%)  | OR 2.10<br>(0.94 to 4.68)    | 104 more per 1,000<br>(from 11 fewer to 167 more) | ⊕⊕○○<br>LOW      | CRITICAL   |
| Xhol loss NPC vs. other EBV-associated non-NPC tumors biopsy in non-endemic regions |                       |                               |               |              |                      |                                                                                                                           |                 |                 |                              |                                                   |                  |            |
| 3                                                                                   | observational studies | very serious <sup>a,b,c</sup> | not serious   | not serious  | serious <sup>c</sup> | very strong association<br>all plausible residual confounding would reduce the demonstrated effect                        | 9/25 (36.0%)    | 1/50 (2.0%)     | OR 11.84<br>(2.32 to 60.45)  | 175 more per 1,000<br>(from 25 more to 532 more)  | ⊕⊕○○<br>LOW      | CRITICAL   |

| Certainty assessment |              |              |               |              |             |                      | № of patients |  | Effect            |                   | Certainty | Importance |
|----------------------|--------------|--------------|---------------|--------------|-------------|----------------------|---------------|--|-------------------|-------------------|-----------|------------|
| № of studies         | Study design | Risk of bias | Inconsistency | Indirectness | Imprecision | Other considerations | LMP1 variants |  | Relative (95% CI) | Absolute (95% CI) |           |            |

#### 30-bp deletion NPC vs. healthy respondents biopsy

|   |                       |             |             |             |             |                                                                         |                |               |                                  |                                                         |                                                                                                 |           |
|---|-----------------------|-------------|-------------|-------------|-------------|-------------------------------------------------------------------------|----------------|---------------|----------------------------------|---------------------------------------------------------|-------------------------------------------------------------------------------------------------|-----------|
| 4 | observational studies | not serious | not serious | not serious | not serious | all plausible residual confounding would reduce the demonstrated effect | 98/128 (76.6%) | 36/57 (63.2%) | <b>OR 3.53</b><br>(1.48 to 8.43) | <b>227 more per 1,000</b><br>(from 86 more to 304 more) | <br>MODERATE | IMPORTANT |
|---|-----------------------|-------------|-------------|-------------|-------------|-------------------------------------------------------------------------|----------------|---------------|----------------------------------|---------------------------------------------------------|-------------------------------------------------------------------------------------------------|-----------|

#### 30-bp deletion NPC biopsy vs. healthy respondents TWs

|   |                       |             |             |             |             |                                                                         |                 |                 |                                  |                                                          |                                                                                                 |           |
|---|-----------------------|-------------|-------------|-------------|-------------|-------------------------------------------------------------------------|-----------------|-----------------|----------------------------------|----------------------------------------------------------|-------------------------------------------------------------------------------------------------|-----------|
| 6 | observational studies | not serious | not serious | not serious | not serious | all plausible residual confounding would reduce the demonstrated effect | 248/273 (90.8%) | 119/171 (69.6%) | <b>OR 3.77</b><br>(2.21 to 6.44) | <b>200 more per 1,000</b><br>(from 139 more to 241 more) | <br>MODERATE | IMPORTANT |
|---|-----------------------|-------------|-------------|-------------|-------------|-------------------------------------------------------------------------|-----------------|-----------------|----------------------------------|----------------------------------------------------------|-------------------------------------------------------------------------------------------------|-----------|

#### 30-bp deletion NPC biopsy vs. other EBV-associated non-NPC tumors biopsy

|    |                       |             |         |                      |             |                                                                         |                 |                 |                                  |                                                          |                                                                                                 |           |
|----|-----------------------|-------------|---------|----------------------|-------------|-------------------------------------------------------------------------|-----------------|-----------------|----------------------------------|----------------------------------------------------------|-------------------------------------------------------------------------------------------------|-----------|
| 20 | observational studies | not serious | serious | serious <sup>d</sup> | not serious | all plausible residual confounding would reduce the demonstrated effect | 393/533 (73.7%) | 246/441 (55.8%) | <b>OR 1.79</b><br>(0.79 to 4.04) | <b>135 more per 1,000</b><br>(from 59 fewer to 278 more) | <br>VERY LOW | IMPORTANT |
|----|-----------------------|-------------|---------|----------------------|-------------|-------------------------------------------------------------------------|-----------------|-----------------|----------------------------------|----------------------------------------------------------|-------------------------------------------------------------------------------------------------|-----------|

#### 30-bp deletion NPC vs. healthy respondents TWs

|   |                       |             |             |             |             |                                                                         |                |               |                                  |                                                         |                                                                                                  |           |
|---|-----------------------|-------------|-------------|-------------|-------------|-------------------------------------------------------------------------|----------------|---------------|----------------------------------|---------------------------------------------------------|--------------------------------------------------------------------------------------------------|-----------|
| 3 | observational studies | not serious | not serious | not serious | not serious | all plausible residual confounding would reduce the demonstrated effect | 79/153 (51.6%) | 55/96 (57.3%) | <b>OR 1.25</b><br>(0.71 to 2.21) | <b>54 more per 1,000</b><br>(from 85 fewer to 175 more) | <br>MODERATE | IMPORTANT |
|---|-----------------------|-------------|-------------|-------------|-------------|-------------------------------------------------------------------------|----------------|---------------|----------------------------------|---------------------------------------------------------|--------------------------------------------------------------------------------------------------|-----------|

#### 30-bp deletion NPC blood vs Healthy blood

|   |                       |             |                      |                      |             |                                                                         |                |                |                                  |                                                           |                                                                                                   |           |
|---|-----------------------|-------------|----------------------|----------------------|-------------|-------------------------------------------------------------------------|----------------|----------------|----------------------------------|-----------------------------------------------------------|---------------------------------------------------------------------------------------------------|-----------|
| 5 | observational studies | not serious | serious <sup>a</sup> | serious <sup>d</sup> | not serious | all plausible residual confounding would reduce the demonstrated effect | 52/201 (25.9%) | 34/179 (19.0%) | <b>OR 0.82</b><br>(0.18 to 3.83) | <b>29 fewer per 1,000</b><br>(from 149 fewer to 283 more) | <br>VERY LOW | IMPORTANT |
|---|-----------------------|-------------|----------------------|----------------------|-------------|-------------------------------------------------------------------------|----------------|----------------|----------------------------------|-----------------------------------------------------------|---------------------------------------------------------------------------------------------------|-----------|

#### 30-bp deletion NPC vs. other EBV-associated non-NPC tumors biopsy in endemic regions

| Certainty assessment |                       |              |               |              |             |                                                                         | № of patients   |                 | Effect                           |                                                         | Certainty                                                                                       | Importance |
|----------------------|-----------------------|--------------|---------------|--------------|-------------|-------------------------------------------------------------------------|-----------------|-----------------|----------------------------------|---------------------------------------------------------|-------------------------------------------------------------------------------------------------|------------|
| № of studies         | Study design          | Risk of bias | Inconsistency | Indirectness | Imprecision | Other considerations                                                    | LMP1 variants   |                 | Relative (95% CI)                | Absolute (95% CI)                                       |                                                                                                 |            |
| 7                    | observational studies | not serious  | not serious   | not serious  | not serious | all plausible residual confounding would reduce the demonstrated effect | 197/223 (88.3%) | 110/142 (77.5%) | <b>OR 1.59</b><br>(0.83 to 3.06) | <b>71 more per 1,000</b><br>(from 34 fewer to 139 more) | <br>MODERATE | IMPORTANT  |

**30-bp deletion NPC vs. healthy respondents biopsy in endemic regions**

|   |                       |             |                      |             |                      |                                                                                               |                 |               |                                   |                                                         |                                                                                            |           |
|---|-----------------------|-------------|----------------------|-------------|----------------------|-----------------------------------------------------------------------------------------------|-----------------|---------------|-----------------------------------|---------------------------------------------------------|--------------------------------------------------------------------------------------------|-----------|
| 5 | observational studies | not serious | serious <sup>a</sup> | not serious | serious <sup>c</sup> | strong association<br>all plausible residual confounding would reduce the demonstrated effect | 135/171 (78.9%) | 45/80 (56.3%) | <b>OR 6.91</b><br>(1.18 to 40.35) | <b>336 more per 1,000</b><br>(from 40 more to 419 more) | <br>LOW | IMPORTANT |
|---|-----------------------|-------------|----------------------|-------------|----------------------|-----------------------------------------------------------------------------------------------|-----------------|---------------|-----------------------------------|---------------------------------------------------------|--------------------------------------------------------------------------------------------|-----------|

**30-bp deletion NPC biopsy vs. healthy respondents TWs in endemic regions**

|   |                       |             |                      |             |             |                                                                         |                 |                 |                                  |                                                         |                                                                                            |           |
|---|-----------------------|-------------|----------------------|-------------|-------------|-------------------------------------------------------------------------|-----------------|-----------------|----------------------------------|---------------------------------------------------------|--------------------------------------------------------------------------------------------|-----------|
| 6 | observational studies | not serious | serious <sup>c</sup> | not serious | not serious | all plausible residual confounding would reduce the demonstrated effect | 222/247 (89.9%) | 114/155 (73.5%) | <b>OR 2.80</b><br>(1.62 to 4.84) | <b>151 more per 1,000</b><br>(from 83 more to 195 more) | <br>LOW | IMPORTANT |
|---|-----------------------|-------------|----------------------|-------------|-------------|-------------------------------------------------------------------------|-----------------|-----------------|----------------------------------|---------------------------------------------------------|--------------------------------------------------------------------------------------------|-----------|

**30-bp deletion NPC vs. other EBV-associated non-NPC tumors biopsy in non-endemic regions**

|   |                       |             |             |                      |             |                                                                         |               |               |                                  |                                                          |                                                                                            |           |
|---|-----------------------|-------------|-------------|----------------------|-------------|-------------------------------------------------------------------------|---------------|---------------|----------------------------------|----------------------------------------------------------|--------------------------------------------------------------------------------------------|-----------|
| 7 | observational studies | not serious | not serious | serious <sup>d</sup> | not serious | all plausible residual confounding would reduce the demonstrated effect | 20/84 (23.8%) | 32/80 (40.0%) | <b>OR 0.67</b><br>(0.33 to 1.36) | <b>91 fewer per 1,000</b><br>(from 220 fewer to 76 more) | <br>LOW | IMPORTANT |
|---|-----------------------|-------------|-------------|----------------------|-------------|-------------------------------------------------------------------------|---------------|---------------|----------------------------------|----------------------------------------------------------|--------------------------------------------------------------------------------------------|-----------|

**69-bp deletion NPC vs. other EBV-associated non-NPC tumors biopsy**

|   |                       |             |             |             |             |                                                                         |                |             |                                  |                                                         |                                                                                                   |           |
|---|-----------------------|-------------|-------------|-------------|-------------|-------------------------------------------------------------------------|----------------|-------------|----------------------------------|---------------------------------------------------------|---------------------------------------------------------------------------------------------------|-----------|
| 4 | observational studies | not serious | not serious | not serious | not serious | all plausible residual confounding would reduce the demonstrated effect | 18/123 (14.6%) | 5/62 (8.1%) | <b>OR 1.70</b><br>(0.63 to 4.61) | <b>49 more per 1,000</b><br>(from 28 fewer to 207 more) | <br>MODERATE | IMPORTANT |
|---|-----------------------|-------------|-------------|-------------|-------------|-------------------------------------------------------------------------|----------------|-------------|----------------------------------|---------------------------------------------------------|---------------------------------------------------------------------------------------------------|-----------|

**69-bp deletion NPC biopsy vs. healthy respondents perihelal blood**

|   |                       |             |                      |             |             |                                                                         |                |              |                                   |                                                         |                                                                                              |           |
|---|-----------------------|-------------|----------------------|-------------|-------------|-------------------------------------------------------------------------|----------------|--------------|-----------------------------------|---------------------------------------------------------|----------------------------------------------------------------------------------------------|-----------|
| 4 | observational studies | not serious | serious <sup>a</sup> | not serious | not serious | all plausible residual confounding would reduce the demonstrated effect | 17/168 (10.1%) | 5/106 (4.7%) | <b>OR 2.22</b><br>(0.26 to 18.60) | <b>52 more per 1,000</b><br>(from 34 fewer to 432 more) | <br>LOW | IMPORTANT |
|---|-----------------------|-------------|----------------------|-------------|-------------|-------------------------------------------------------------------------|----------------|--------------|-----------------------------------|---------------------------------------------------------|----------------------------------------------------------------------------------------------|-----------|

| Certainty assessment |              |              |               |              |             |                      | № of patients |  | Effect            |                   | Certainty | Importance |
|----------------------|--------------|--------------|---------------|--------------|-------------|----------------------|---------------|--|-------------------|-------------------|-----------|------------|
| № of studies         | Study design | Risk of bias | Inconsistency | Indirectness | Imprecision | Other considerations | LMP1 variants |  | Relative (95% CI) | Absolute (95% CI) |           |            |

#### B95-8 NPC vs. healthy respondents biopsy

|   |                       |                      |                      |                      |             |                                                                         |               |              |                                  |                                                         |                                                                                                 |               |
|---|-----------------------|----------------------|----------------------|----------------------|-------------|-------------------------------------------------------------------------|---------------|--------------|----------------------------------|---------------------------------------------------------|-------------------------------------------------------------------------------------------------|---------------|
| 3 | observational studies | serious <sup>a</sup> | serious <sup>a</sup> | serious <sup>d</sup> | not serious | all plausible residual confounding would reduce the demonstrated effect | 12/62 (19.4%) | 5/29 (17.2%) | <b>OR 1.27</b><br>(0.44 to 3.67) | <b>37 more per 1,000</b><br>(from 88 fewer to 261 more) | <br>VERY LOW | NOT IMPORTANT |
|---|-----------------------|----------------------|----------------------|----------------------|-------------|-------------------------------------------------------------------------|---------------|--------------|----------------------------------|---------------------------------------------------------|-------------------------------------------------------------------------------------------------|---------------|

#### B95.8-A NPC vs. healthy respondents TWs

|   |                       |                      |                      |                      |             |                                                                         |               |               |                                  |                                                     |                                                                                                 |           |
|---|-----------------------|----------------------|----------------------|----------------------|-------------|-------------------------------------------------------------------------|---------------|---------------|----------------------------------|-----------------------------------------------------|-------------------------------------------------------------------------------------------------|-----------|
| 3 | observational studies | serious <sup>a</sup> | serious <sup>a</sup> | serious <sup>d</sup> | not serious | all plausible residual confounding would reduce the demonstrated effect | 10/83 (12.0%) | 14/29 (48.3%) | <b>OR 0.16</b><br>(0.00 to 5.90) | <b>353 fewer per 1,000</b><br>(from -- to 364 more) | <br>VERY LOW | IMPORTANT |
|---|-----------------------|----------------------|----------------------|----------------------|-------------|-------------------------------------------------------------------------|---------------|---------------|----------------------------------|-----------------------------------------------------|-------------------------------------------------------------------------------------------------|-----------|

#### B95.8/A NPC vs. healthy respondents peripheral blood

|   |                       |             |             |             |             |                                                                                                |               |               |                                  |                                                             |                                                                                                 |           |
|---|-----------------------|-------------|-------------|-------------|-------------|------------------------------------------------------------------------------------------------|---------------|---------------|----------------------------------|-------------------------------------------------------------|-------------------------------------------------------------------------------------------------|-----------|
| 3 | observational studies | not serious | not serious | not serious | not serious | all plausible residual confounding would suggest spurious effect, while no effect was observed | 10/65 (15.4%) | 46/66 (69.7%) | <b>OR 0.06</b><br>(0.02 to 0.17) | <b>576 fewer per 1,000</b><br>(from 653 fewer to 416 fewer) | <br>MODERATE | IMPORTANT |
|---|-----------------------|-------------|-------------|-------------|-------------|------------------------------------------------------------------------------------------------|---------------|---------------|----------------------------------|-------------------------------------------------------------|-------------------------------------------------------------------------------------------------|-----------|

#### China 1 NPC vs. other EBV-associated non-NPC tumors biopsy

|   |                       |             |             |             |             |                                                                                                |               |               |                                  |                                                            |                                                                                                  |           |
|---|-----------------------|-------------|-------------|-------------|-------------|------------------------------------------------------------------------------------------------|---------------|---------------|----------------------------------|------------------------------------------------------------|--------------------------------------------------------------------------------------------------|-----------|
| 4 | observational studies | not serious | not serious | not serious | not serious | all plausible residual confounding would suggest spurious effect, while no effect was observed | 12/76 (15.8%) | 13/36 (36.1%) | <b>OR 0.33</b><br>(0.13 to 0.85) | <b>204 fewer per 1,000</b><br>(from 293 fewer to 37 fewer) | <br>MODERATE | IMPORTANT |
|---|-----------------------|-------------|-------------|-------------|-------------|------------------------------------------------------------------------------------------------|---------------|---------------|----------------------------------|------------------------------------------------------------|--------------------------------------------------------------------------------------------------|-----------|

#### China 1 NPC vs. other EBV-associated non-NPC tumors peripheral blood

|   |                       |             |                      |             |             |                                                                                                |               |               |                                  |                                                     |                                                                                              |               |
|---|-----------------------|-------------|----------------------|-------------|-------------|------------------------------------------------------------------------------------------------|---------------|---------------|----------------------------------|-----------------------------------------------------|----------------------------------------------------------------------------------------------|---------------|
| 3 | observational studies | not serious | serious <sup>a</sup> | not serious | not serious | all plausible residual confounding would suggest spurious effect, while no effect was observed | 20/61 (32.8%) | 24/39 (61.5%) | <b>OR 0.10</b><br>(0.00 to 2.34) | <b>477 fewer per 1,000</b><br>(from -- to 174 more) | <br>LOW | NOT IMPORTANT |
|---|-----------------------|-------------|----------------------|-------------|-------------|------------------------------------------------------------------------------------------------|---------------|---------------|----------------------------------|-----------------------------------------------------|----------------------------------------------------------------------------------------------|---------------|

#### China 1 NPC vs. other EBV-associated non-NPC tumors TWs

| Certainty assessment |                       |              |                      |                      |                      |                                                                                                | № of patients |               | Effect                           |                                                            | Certainty        | Importance    |
|----------------------|-----------------------|--------------|----------------------|----------------------|----------------------|------------------------------------------------------------------------------------------------|---------------|---------------|----------------------------------|------------------------------------------------------------|------------------|---------------|
| № of studies         | Study design          | Risk of bias | Inconsistency        | Indirectness         | Imprecision          | Other considerations                                                                           | LMP1 variants |               | Relative (95% CI)                | Absolute (95% CI)                                          |                  |               |
| 3                    | observational studies | not serious  | serious <sup>a</sup> | serious <sup>d</sup> | serious <sup>c</sup> | all plausible residual confounding would suggest spurious effect, while no effect was observed | 37/87 (42.5%) | 36/77 (46.8%) | <b>OR 0.25</b><br>(0.01 to 7.88) | <b>288 fewer per 1,000</b><br>(from 459 fewer to 406 more) | ⊕○○○<br>VERY LOW | NOT IMPORTANT |

#### Med NPC vs. other EBV-associated non-NPC tumours biopsy

|   |                       |             |             |             |             |                                                                                                |               |               |                                  |                                                          |                  |           |
|---|-----------------------|-------------|-------------|-------------|-------------|------------------------------------------------------------------------------------------------|---------------|---------------|----------------------------------|----------------------------------------------------------|------------------|-----------|
| 4 | observational studies | not serious | not serious | not serious | not serious | all plausible residual confounding would suggest spurious effect, while no effect was observed | 29/76 (38.2%) | 13/36 (36.1%) | <b>OR 1.14</b><br>(0.50 to 2.63) | <b>31 more per 1,000</b><br>(from 141 fewer to 237 more) | ⊕⊕⊕○<br>MODERATE | IMPORTANT |
|---|-----------------------|-------------|-------------|-------------|-------------|------------------------------------------------------------------------------------------------|---------------|---------------|----------------------------------|----------------------------------------------------------|------------------|-----------|

#### Med NPC vs. other EBV-associated non-NPC tumors peripheral blood

|   |                       |             |                      |                      |             |                                                                                                |               |              |                                   |                                                           |                  |               |
|---|-----------------------|-------------|----------------------|----------------------|-------------|------------------------------------------------------------------------------------------------|---------------|--------------|-----------------------------------|-----------------------------------------------------------|------------------|---------------|
| 3 | observational studies | not serious | serious <sup>a</sup> | serious <sup>d</sup> | not serious | all plausible residual confounding would suggest spurious effect, while no effect was observed | 18/61 (29.5%) | 6/39 (15.4%) | <b>OR 2.26</b><br>(0.21 to 24.18) | <b>137 more per 1,000</b><br>(from 117 fewer to 661 more) | ⊕○○○<br>VERY LOW | NOT IMPORTANT |
|---|-----------------------|-------------|----------------------|----------------------|-------------|------------------------------------------------------------------------------------------------|---------------|--------------|-----------------------------------|-----------------------------------------------------------|------------------|---------------|

#### Med NPC vs. other EBV-associated non-NPC tumors TWs

|   |                       |             |             |             |             |                                                                                                |               |             |                                  |                                                         |                  |           |
|---|-----------------------|-------------|-------------|-------------|-------------|------------------------------------------------------------------------------------------------|---------------|-------------|----------------------------------|---------------------------------------------------------|------------------|-----------|
| 3 | observational studies | not serious | not serious | not serious | not serious | all plausible residual confounding would suggest spurious effect, while no effect was observed | 21/87 (24.1%) | 7/77 (9.1%) | <b>OR 1.95</b><br>(0.67 to 5.69) | <b>72 more per 1,000</b><br>(from 28 fewer to 272 more) | ⊕⊕⊕○<br>MODERATE | IMPORTANT |
|---|-----------------------|-------------|-------------|-------------|-------------|------------------------------------------------------------------------------------------------|---------------|-------------|----------------------------------|---------------------------------------------------------|------------------|-----------|

#### North Carolina NPC vs. other EBV-associated non-NPC tumors biopsy

|   |                       |             |             |             |             |                                                                         |             |              |                                  |                                                            |                  |           |
|---|-----------------------|-------------|-------------|-------------|-------------|-------------------------------------------------------------------------|-------------|--------------|----------------------------------|------------------------------------------------------------|------------------|-----------|
| 3 | observational studies | not serious | not serious | not serious | not serious | all plausible residual confounding would reduce the demonstrated effect | 2/59 (3.4%) | 6/35 (17.1%) | <b>OR 0.20</b><br>(0.04 to 0.90) | <b>132 fewer per 1,000</b><br>(from 163 fewer to 14 fewer) | ⊕⊕⊕○<br>MODERATE | IMPORTANT |
|---|-----------------------|-------------|-------------|-------------|-------------|-------------------------------------------------------------------------|-------------|--------------|----------------------------------|------------------------------------------------------------|------------------|-----------|

CI: Confidence interval; OR: Odds ratio; TW: throat washings

## Explanations

- a. There was no confounding control in the study design, neither in the analysis.
- b. There was a selection bias due to inappropriately classified respondents (by regions, not by outcome).
- c. 95%CI of the odds ratio is wide, as thresholds for grading were considered trivial from 1 to 2.5, small from 2.5 to 5, moderate from 5 to 10, and large 10 and more
- d. There were results in both directions i.e. some studies reported higher, other lower prevalence of LMP1 gene variant in NPCs
- e. There was a great heterogeneity between studies assessed by I<sup>2</sup> statistics in Review Manager
